# Supplementary figures and images for: Cortical ChAT+ neurons co-transmit acetylcholine and GABA in a target- and brain-region-specific manner
Source: eLife journal article supplement (doi:10.7554/elife.57749), 2020-07-02

Figure 2 - figure supplement 1

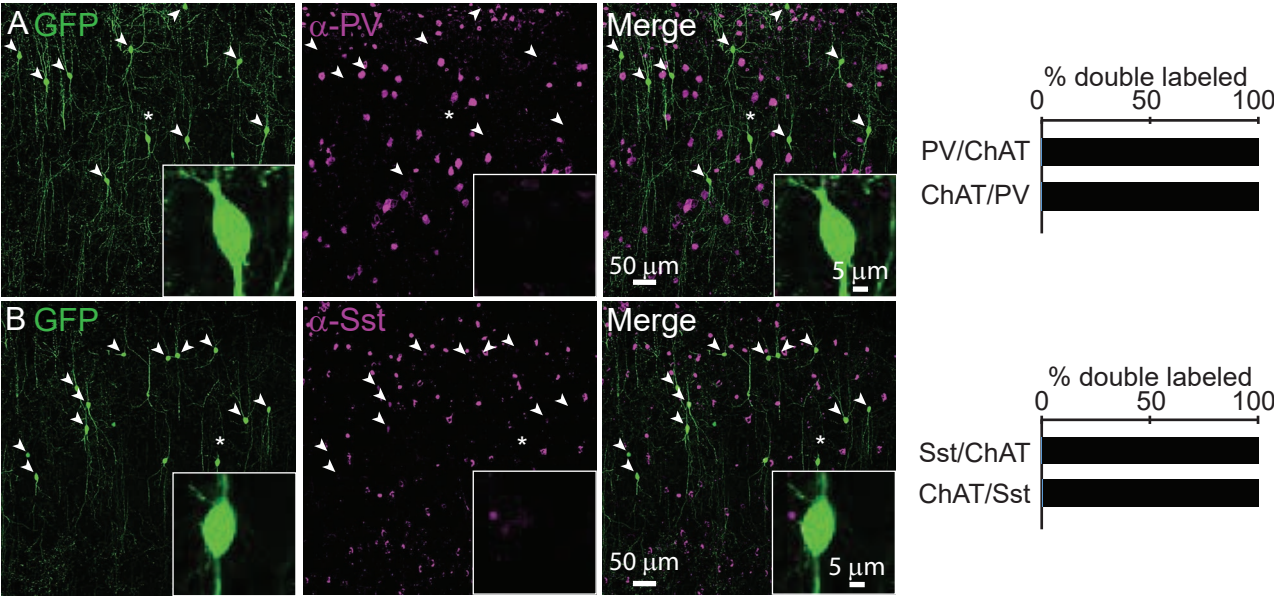

Supplement: supp [file elife_poa_e57749_Figure_2_figure_supplement_1.pdf › elife_poa_e57749_Figure_2_figure_supplement_1.pdf]

Figure 2 - figure supplement 2  
A

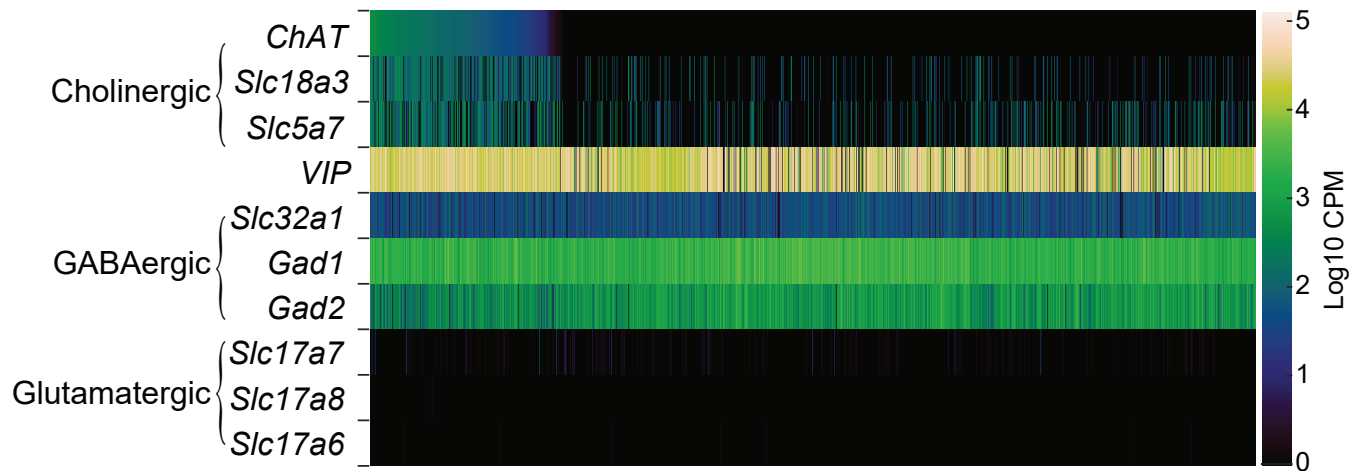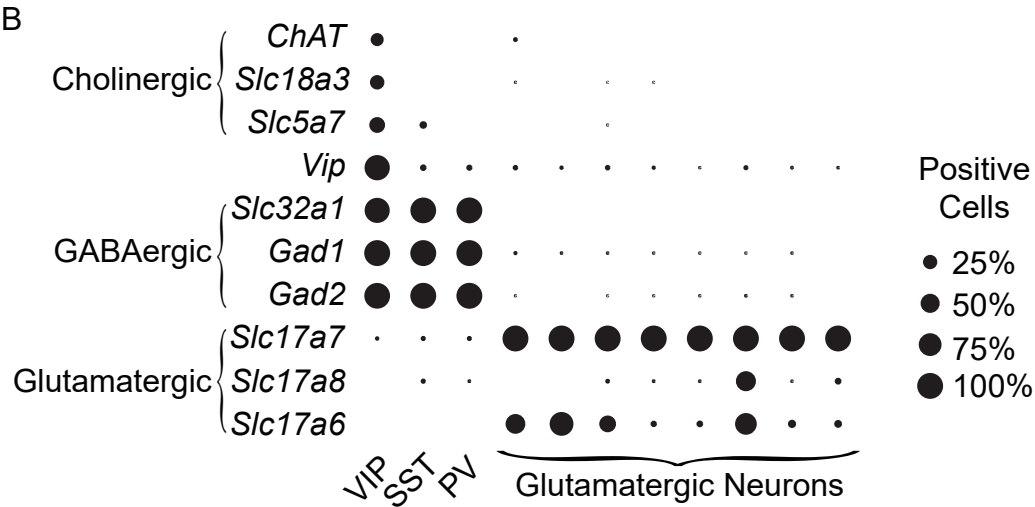

Supplement: supp [file elife_poa_e57749_Figure_2_figure_supplement_2.pdf › elife_poa_e57749_Figure_2_figure_supplement_2.pdf]

Figure 3 - figure supplement 1

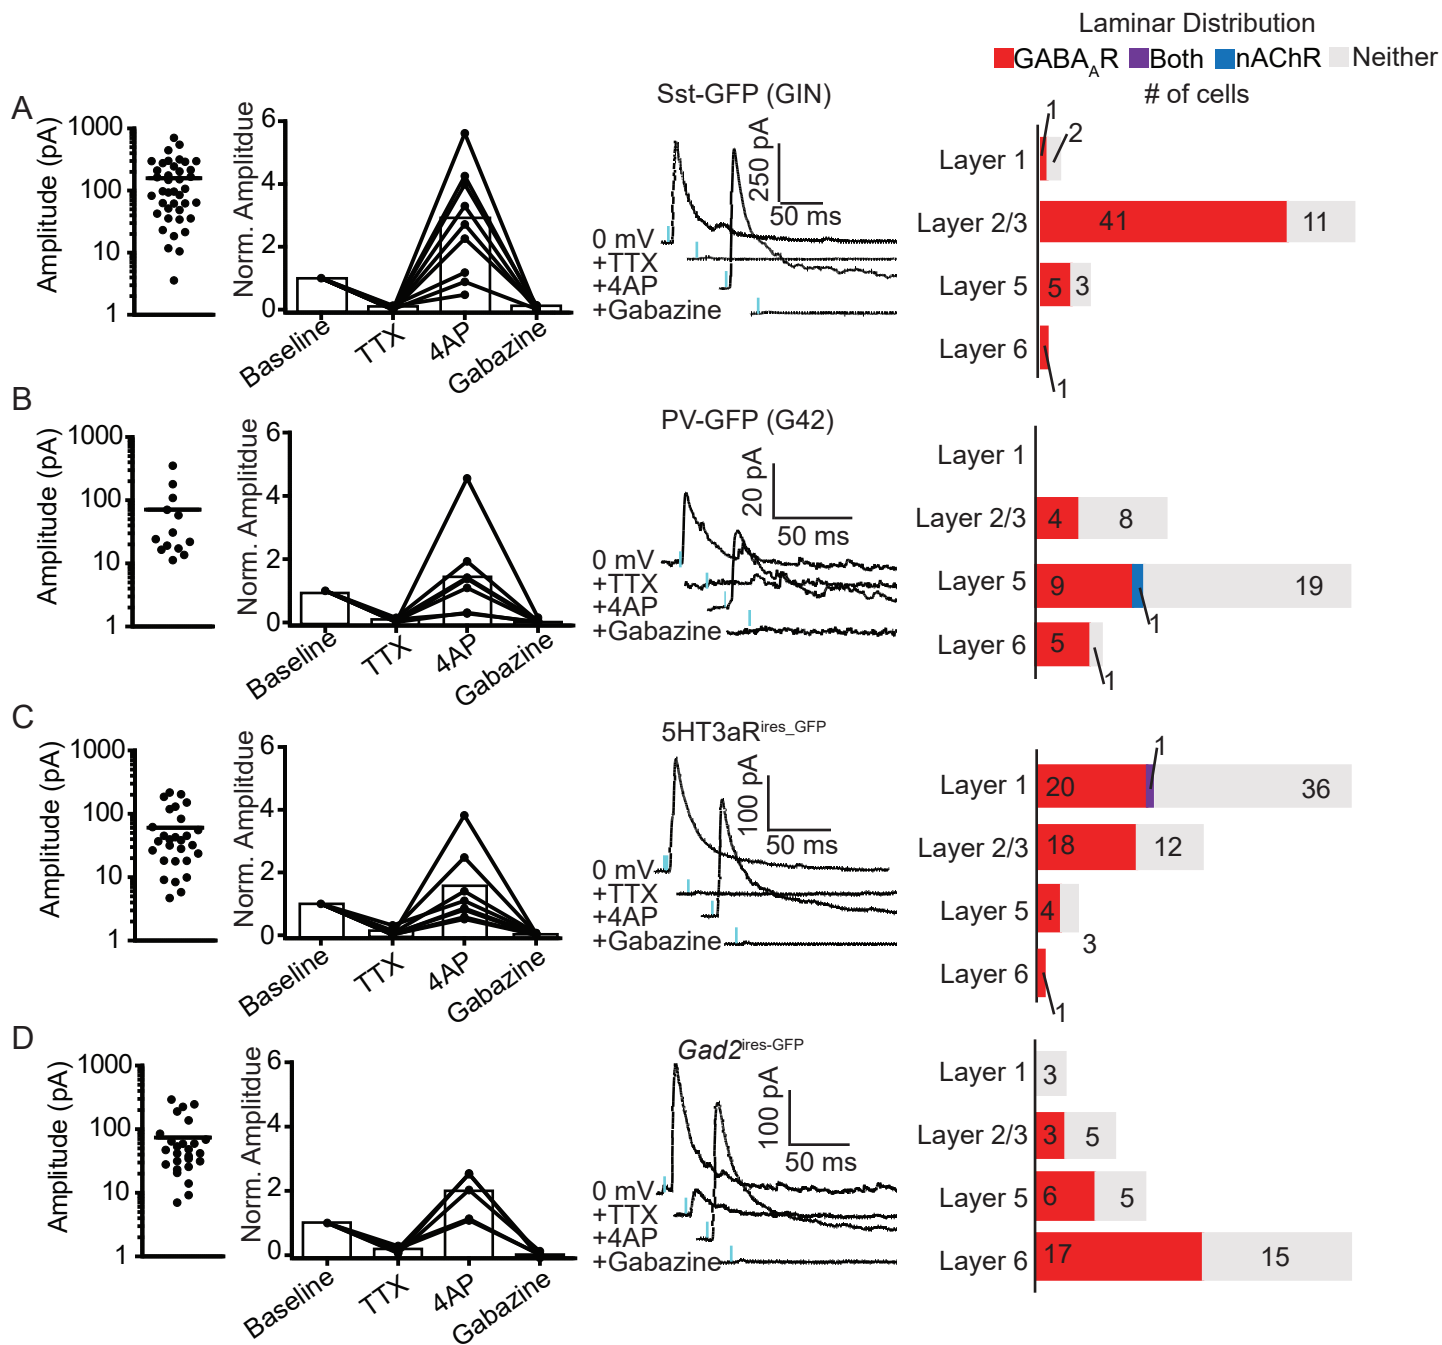

Supplement: supp [file elife_poa_e57749_Figure_3_figure_supplement_1.pdf › elife_poa_e57749_Figure_3_figure_supplement_1.pdf]

Figure 3 - figure supplement 2

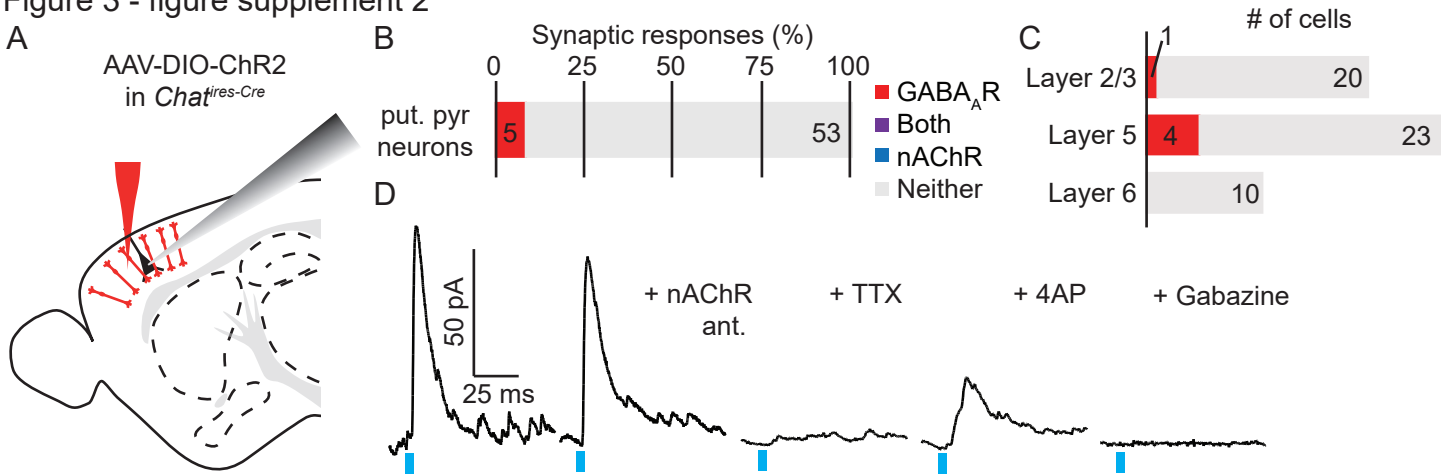

Supplement: supp [file elife_poa_e57749_Figure_3_figure_supplement_2.pdf › elife_poa_e57749_Figure_3_figure_supplement_2.pdf]

Figure 3 - figure supplement 3

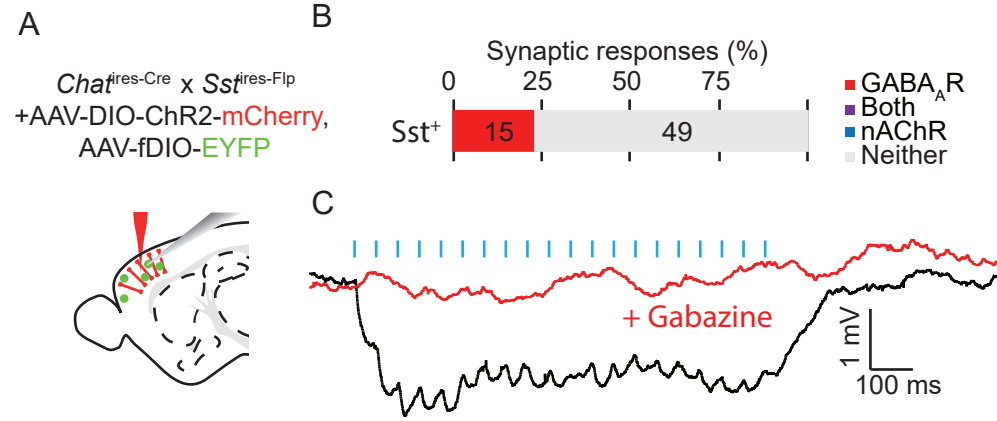

Supplement: supp [file elife_poa_e57749_Figure_3_figure_supplement_3.pdf › elife_poa_e57749_Figure_3_figure_supplement_3.pdf]

Figure 3 - figure supplement 4

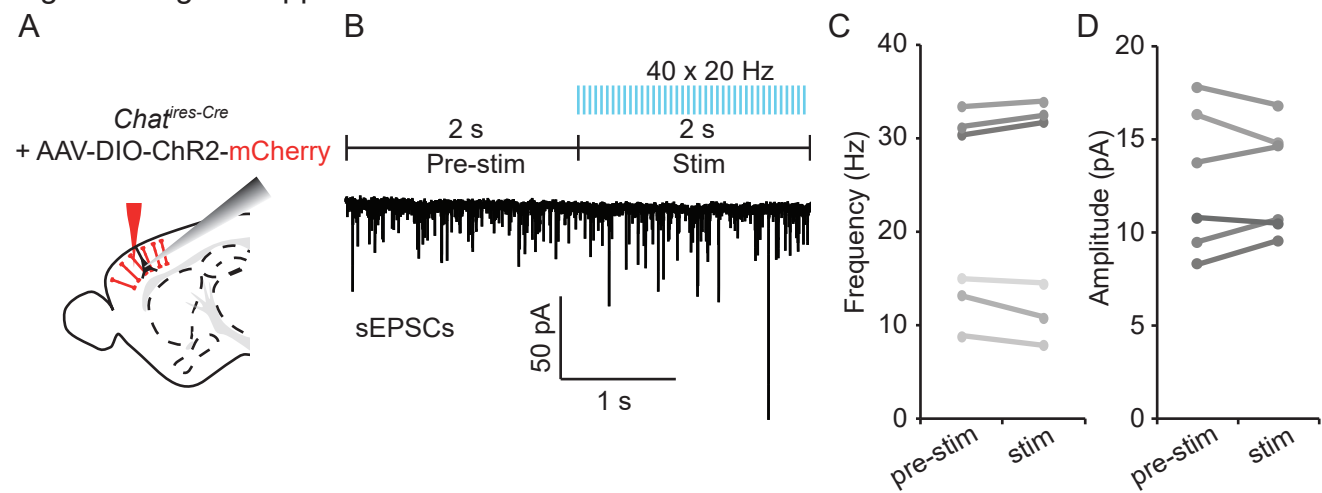

Supplement: supp [file elife_poa_e57749_Figure_3_figure_supplement_4.pdf › elife_poa_e57749_Figure_3_figure_supplement_4.pdf]

Figure 3 - figure supplement 5

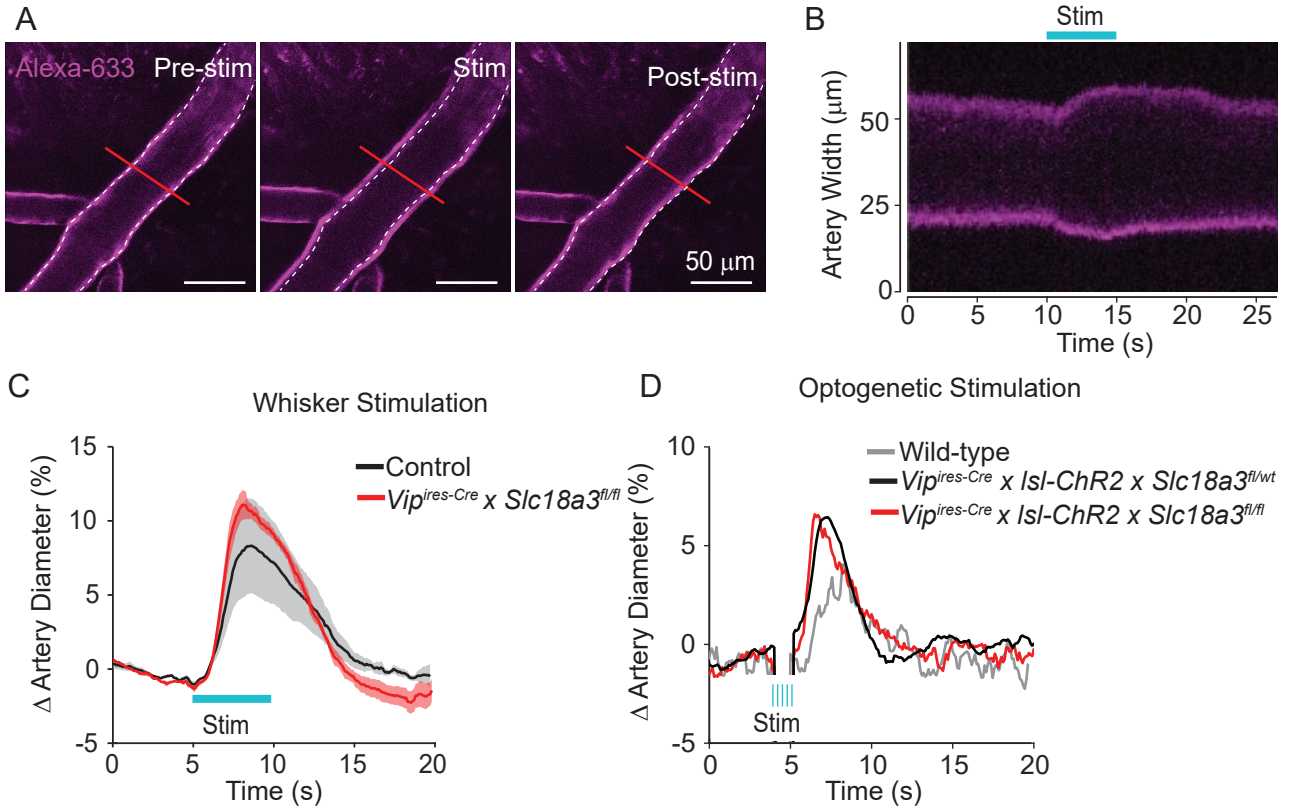

Supplement: supp [file elife_poa_e57749_Figure_3_figure_supplement_5.pdf › elife_poa_e57749_Figure_3_figure_supplement_5.pdf]

Figure 4 - figure supplement 1

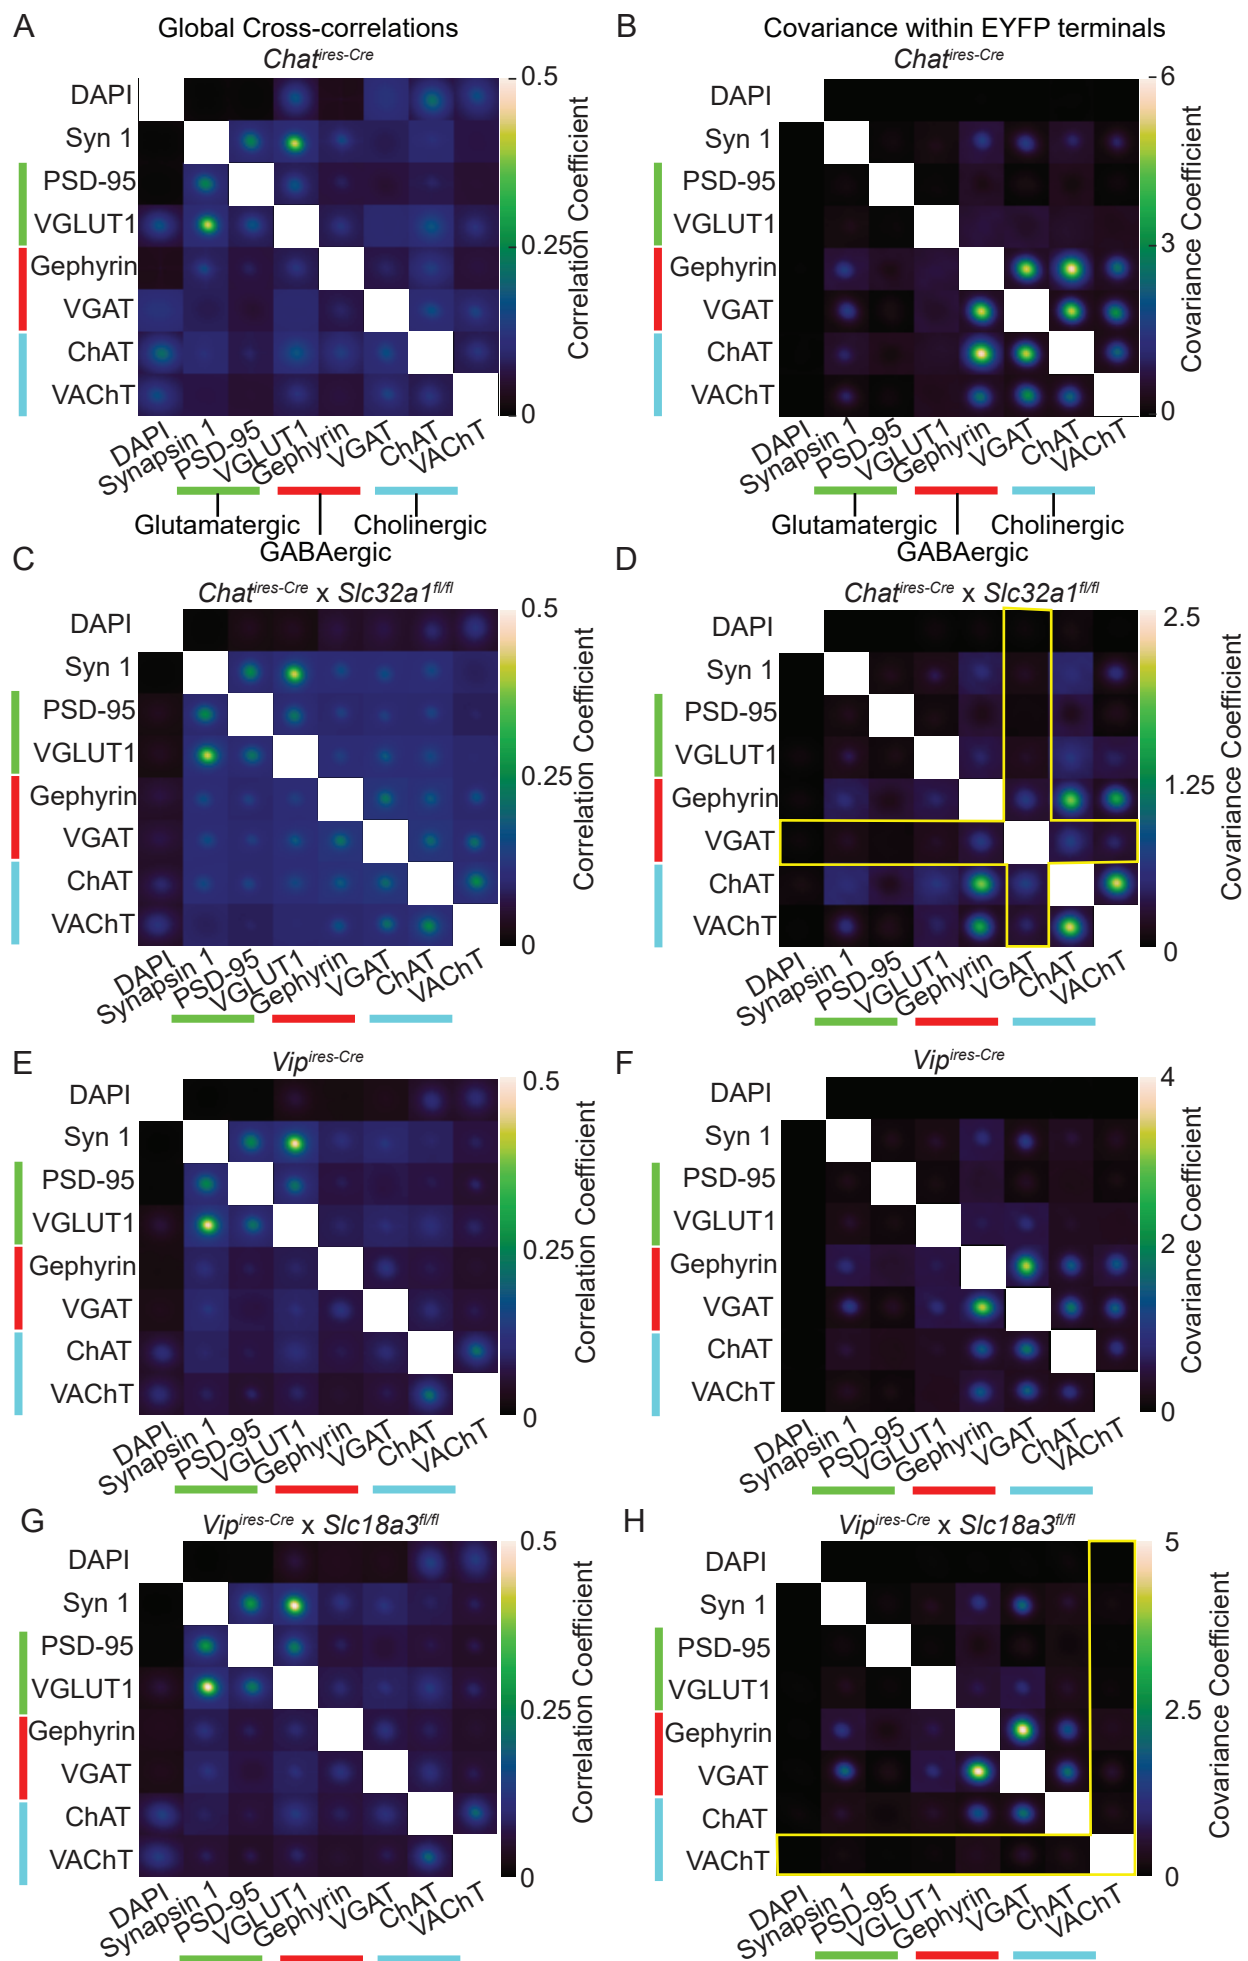

Supplement: supp [file elife_poa_e57749_Figure_4_figure_supplement_1.pdf › elife_poa_e57749_Figure_4_figure_supplement_1.pdf]

Figure 4 - figure supplement 2

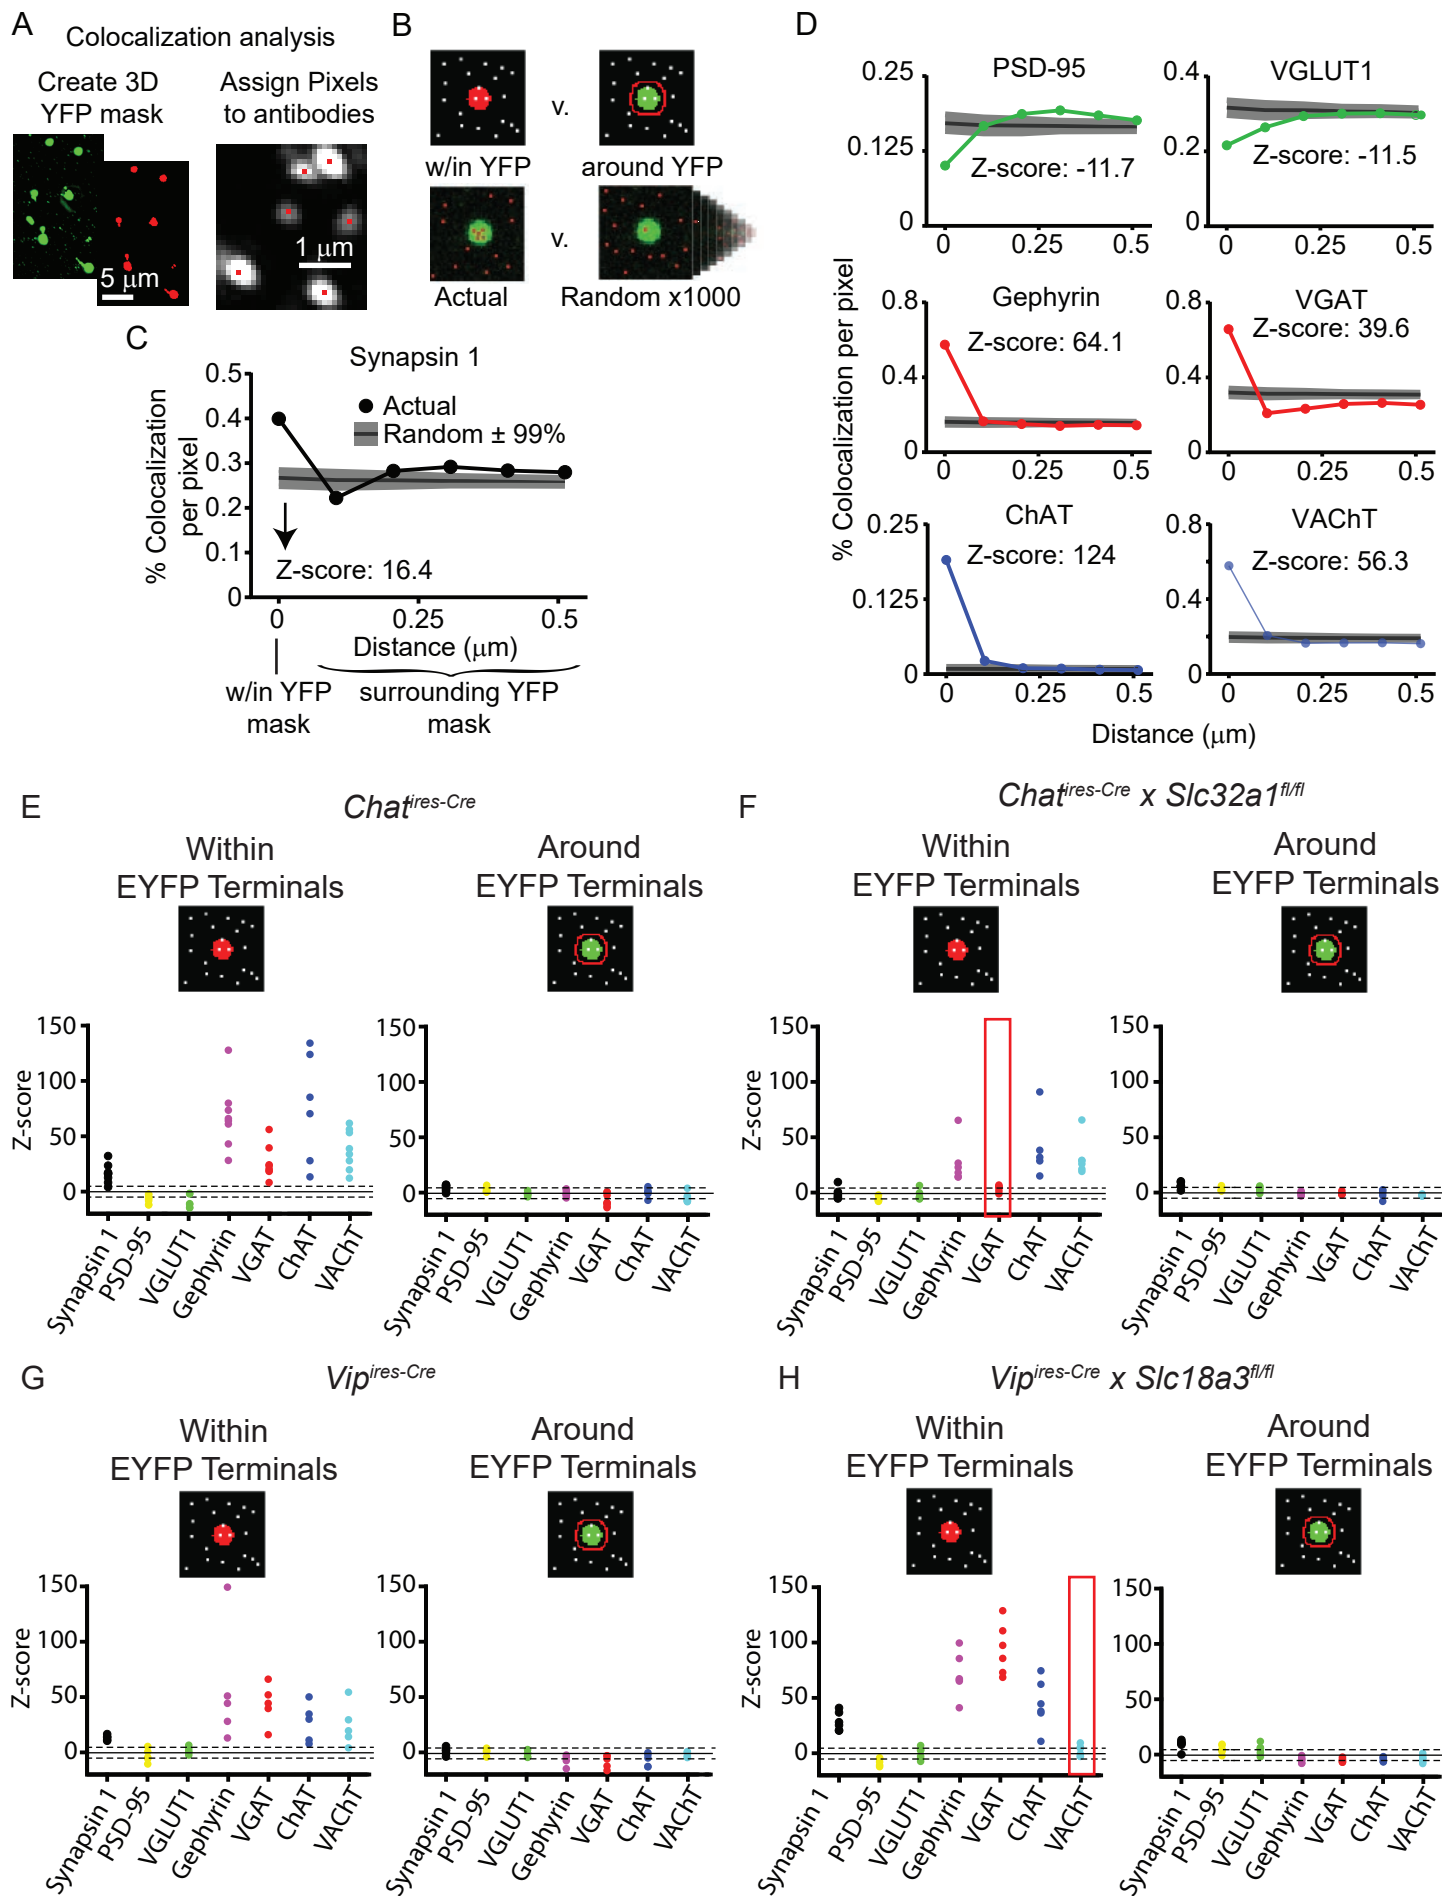

Supplement: supp [file elife_poa_e57749_Figure_4_figure_supplement_2.pdf › elife_poa_e57749_Figure_4_figure_supplement_2.pdf]

Figure 5 - figure supplement 1

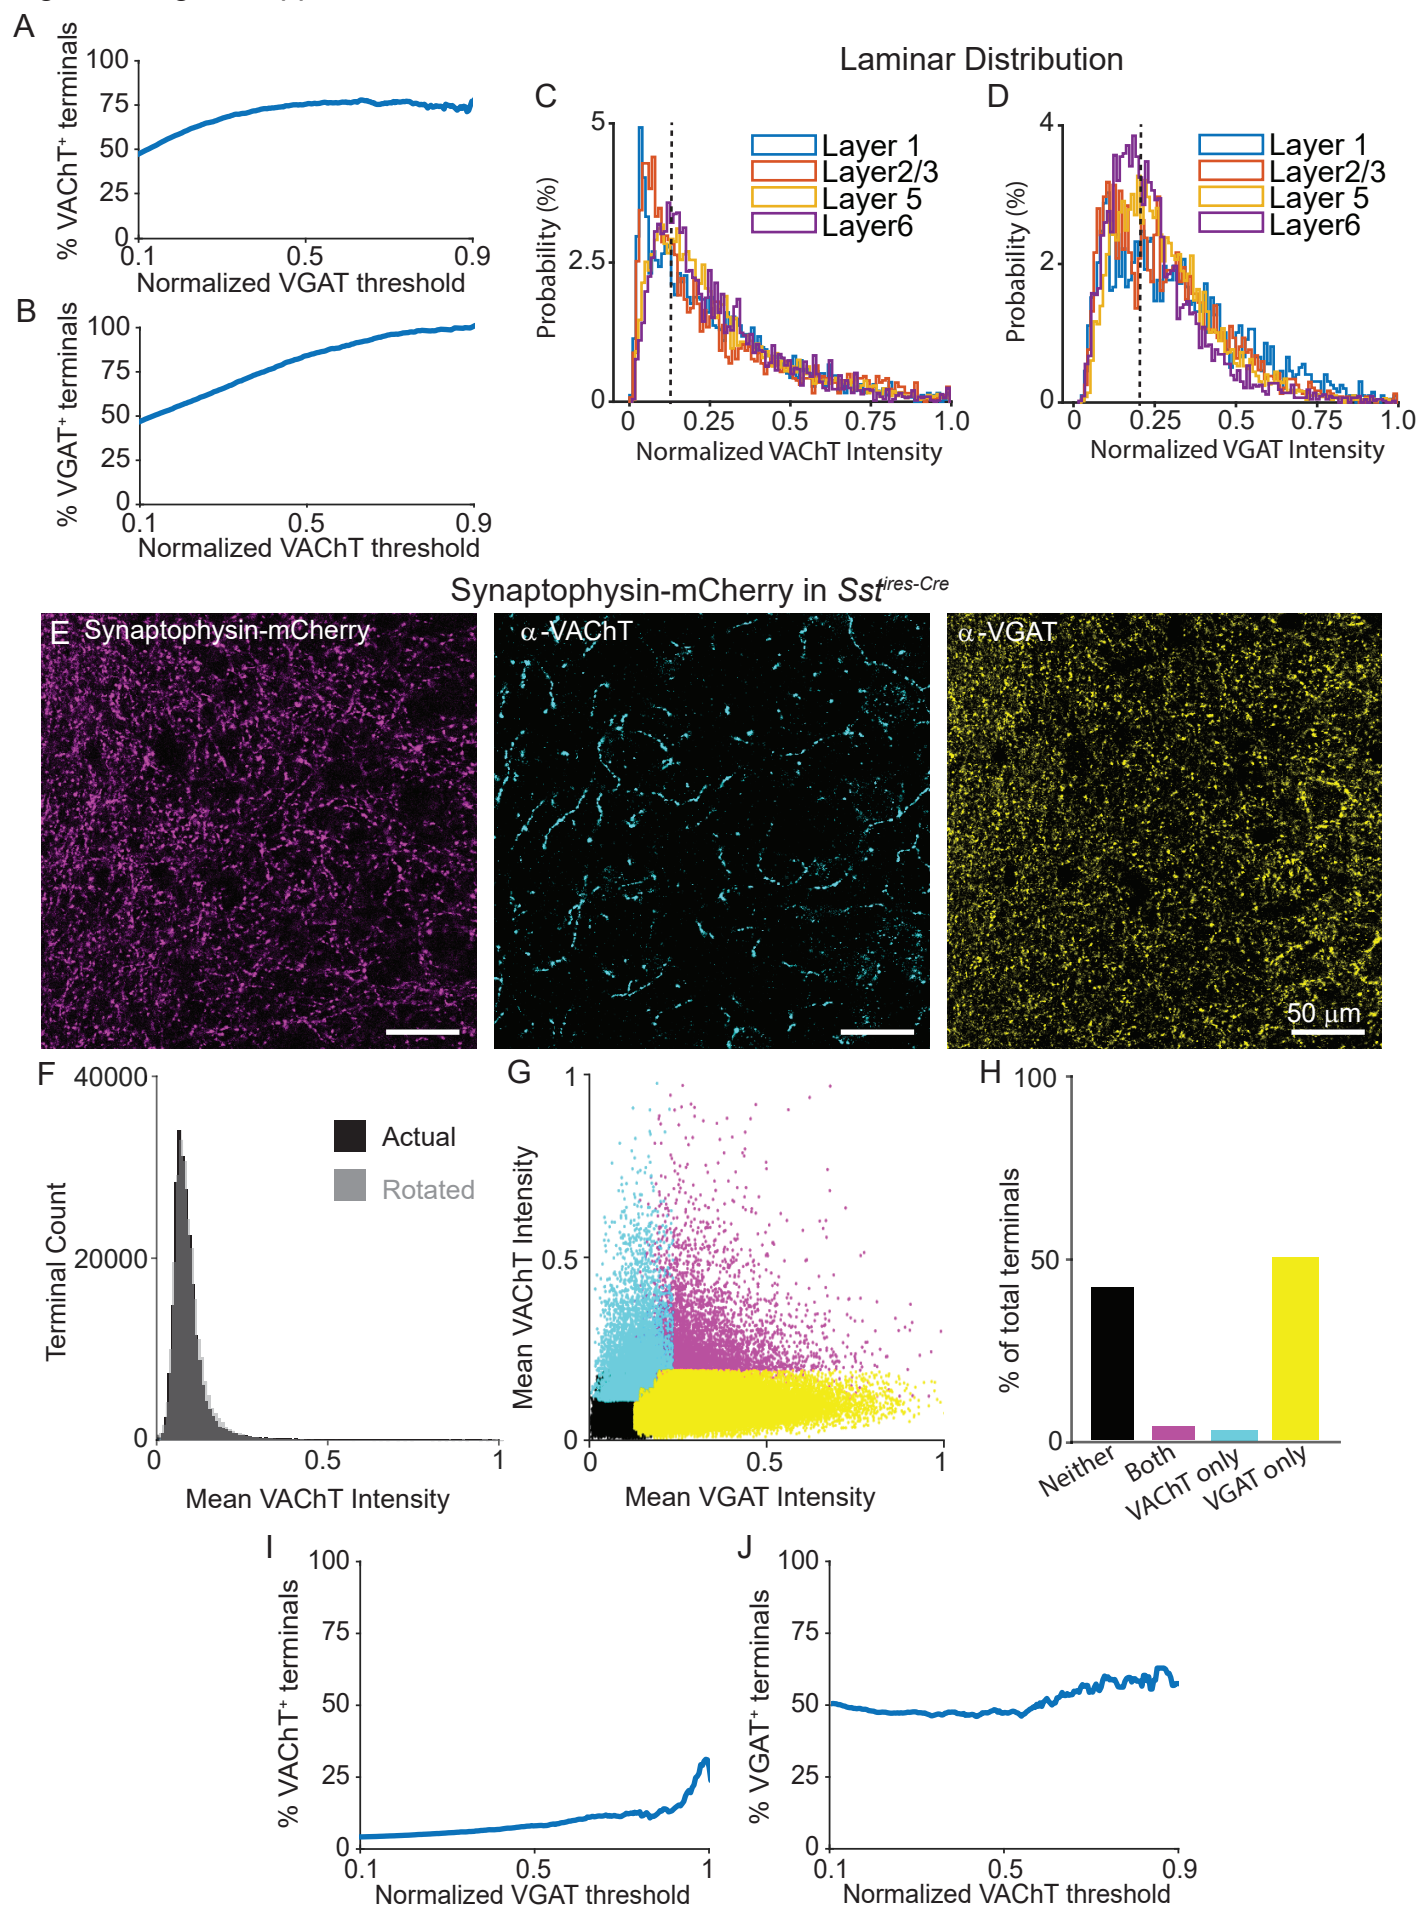

Supplement: supp [file elife_poa_e57749_Figure_5_figure_supplement_1.pdf › elife_poa_e57749_Figure_5_figure_supplement_1.pdf]

Figure 6 - figure supplement 1

A

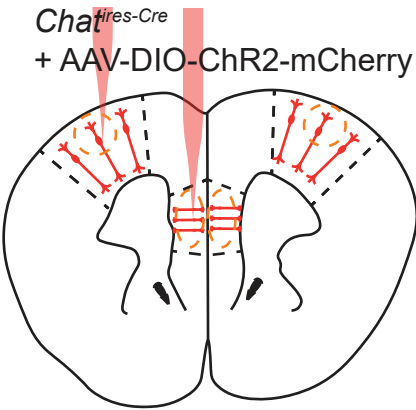

B

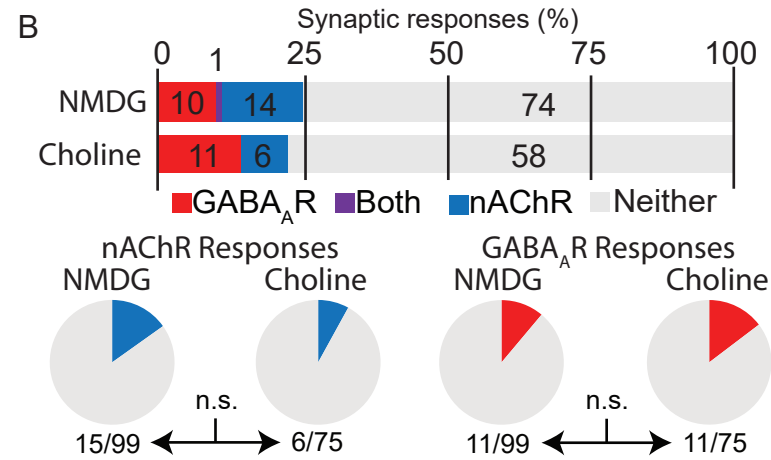

C

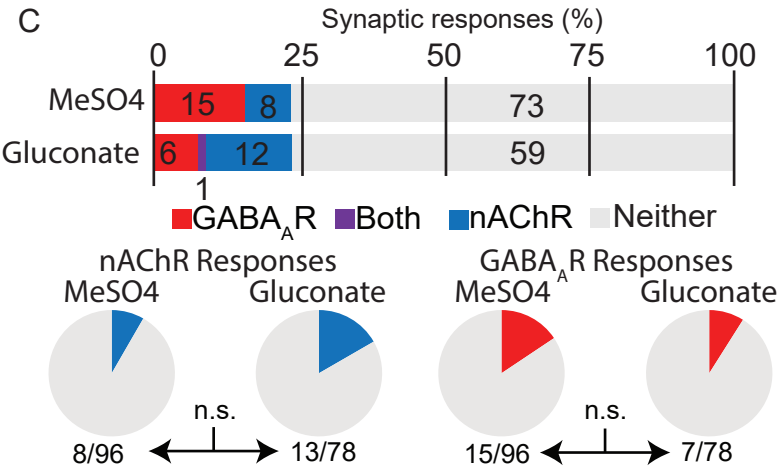

Supplement: supp [file elife_poa_e57749_Figure_6_figure_supplement_1.pdf › elife_poa_e57749_Figure_6_figure_supplement_1.pdf]

Figure 6 - figure supplement 2

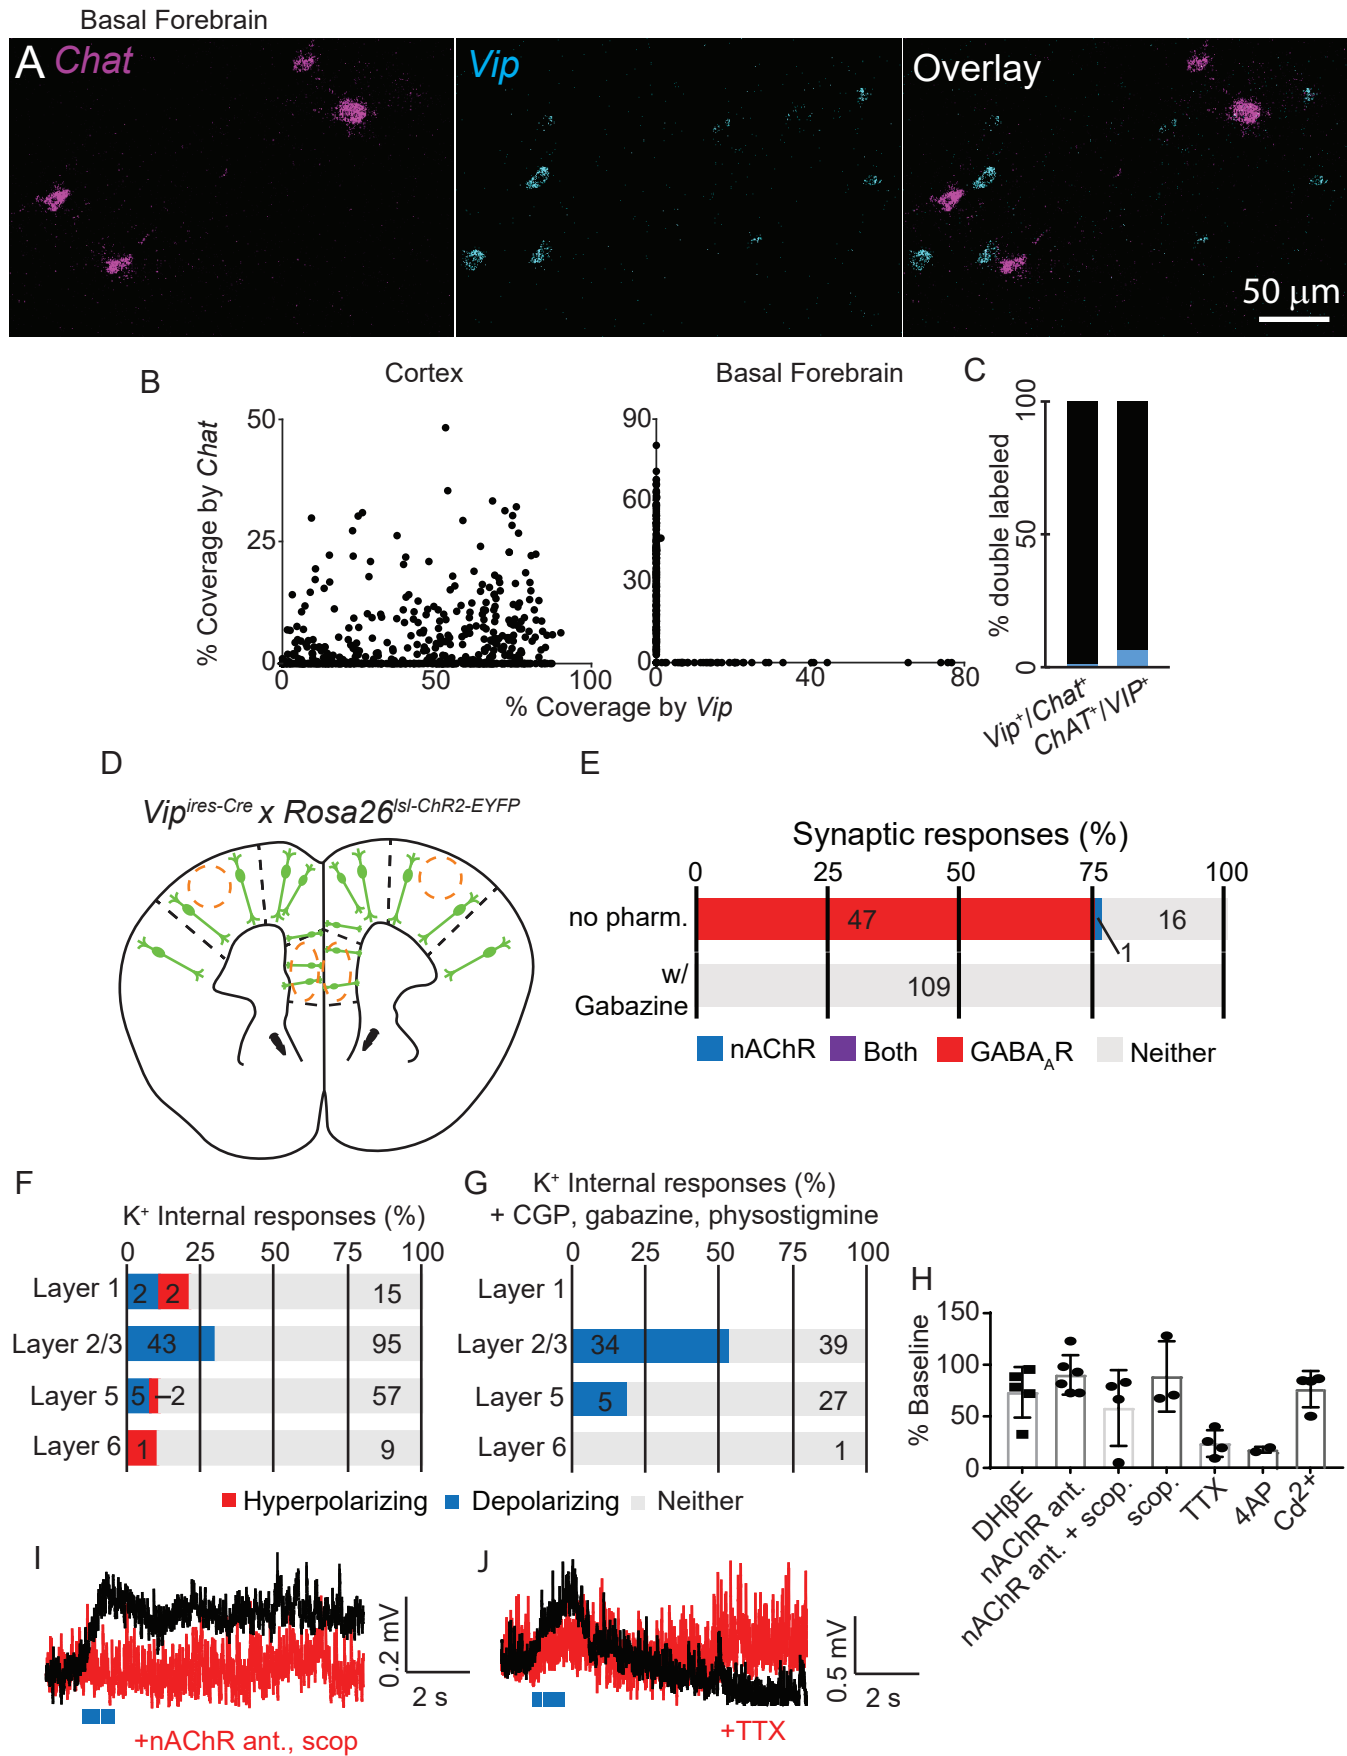

Supplement: supp [file elife_poa_e57749_Figure_6_figure_supplement_2.pdf › elife_poa_e57749_Figure_6_figure_supplement_2.pdf]

Figure 6 - figure supplement 3

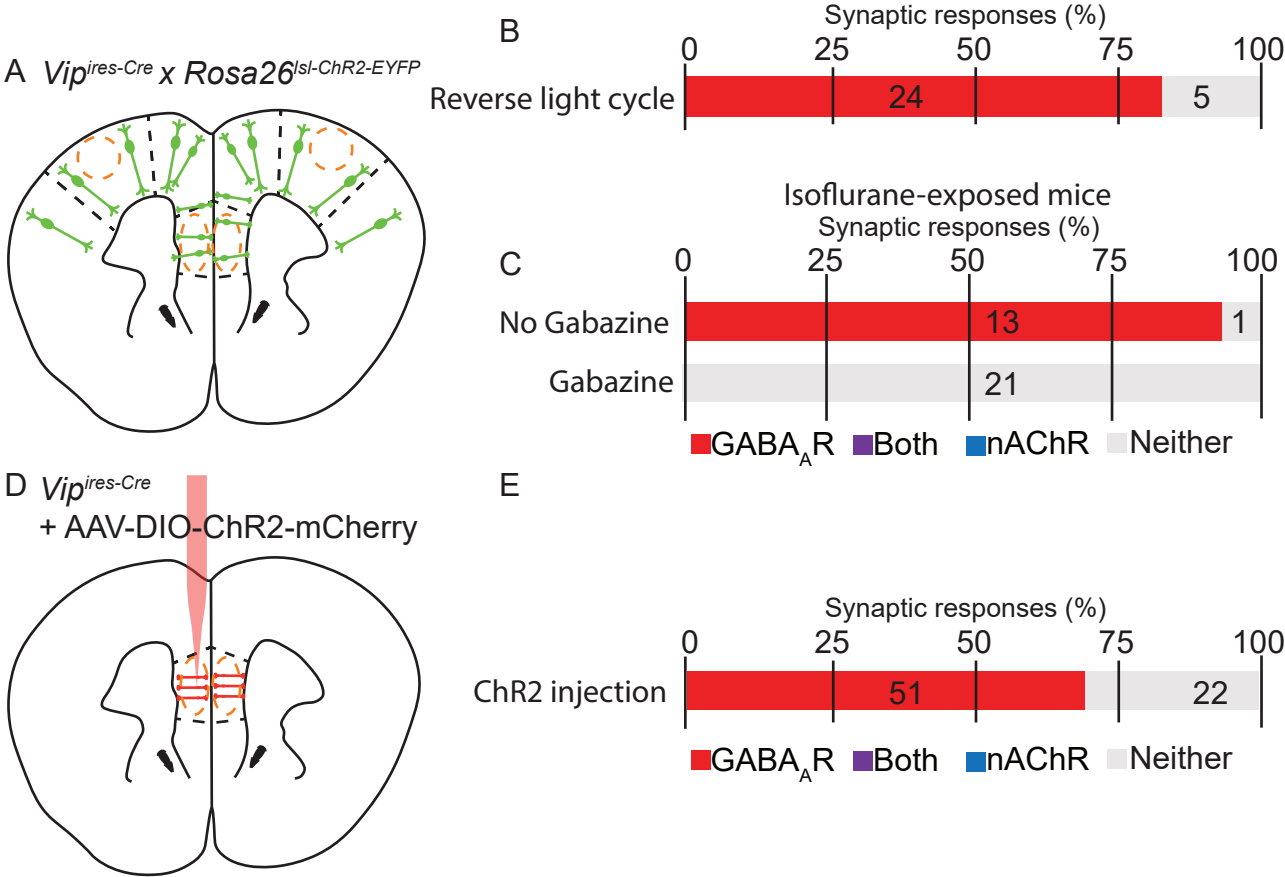

Supplement: supp [file elife_poa_e57749_Figure_6_figure_supplement_3.pdf › elife_poa_e57749_Figure_6_figure_supplement_3.pdf]

Figure 7 - figure supplement 1

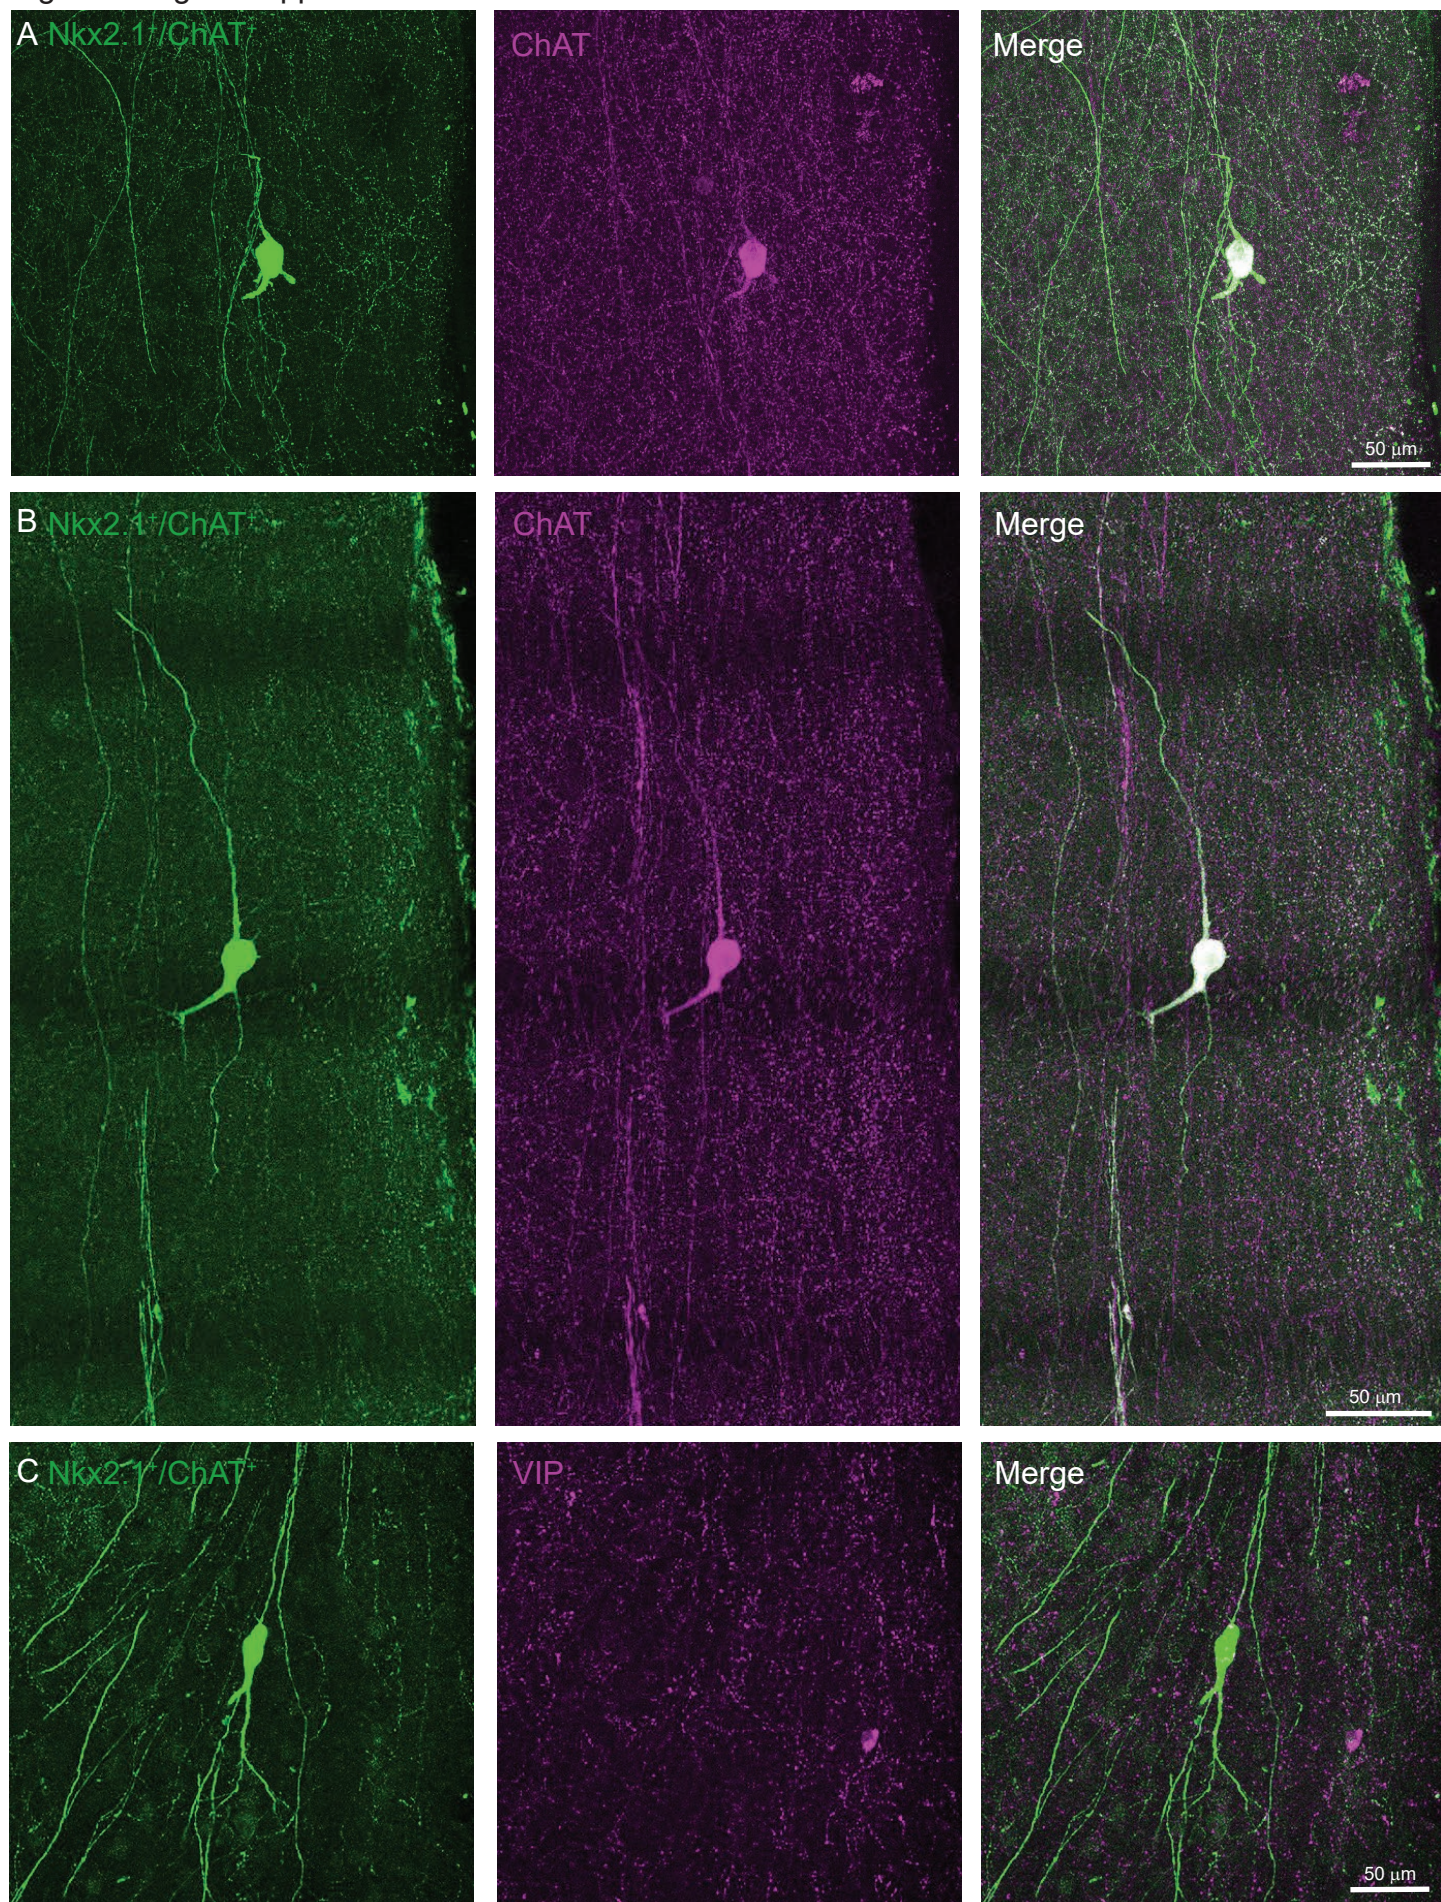

Supplement: supp [file elife_poa_e57749_Figure_7_figure_supplement_1.pdf › elife_poa_e57749_Figure_7_figure_supplement_1.pdf]
